# Supplementary material for: Potential Predictors of Long COVID in Italian Children: A Cross-Sectional Survey
Source: MDPI journal article supplement (doi:10.3390/children11020221), 2024-02-09
Supplement: s1 [file s1]

**Supplementary table S1.** General characteristics of the patients with or without previous COVID-19.

|                                        | All pts<br>n=569 | Pts with no previous COVID-19<br>n=111 | Pts with previous COVID-19<br>n=458 | P value          |
|----------------------------------------|------------------|----------------------------------------|-------------------------------------|------------------|
| Gender (%)                             |                  |                                        |                                     | 0.406            |
| <i>Male</i>                            | 290 (51.0)       | 61 (55.0)                              | 229 (50.0)                          |                  |
| <i>Female</i>                          | 279 (49.0)       | 50 (45.0)                              | 229 (50.0)                          |                  |
| Ethnicity (%)                          |                  |                                        |                                     | 0.454            |
| <i>Non-Caucasian</i>                   | 48 (11.5)        | 7 (8.5)                                | 41 (12.2)                           |                  |
| <i>Caucasian</i>                       | 369 (88.5)       | 75 (91.5)                              | 294 (87.8)                          |                  |
| COVID-19 vaccine (%)                   |                  |                                        |                                     | <b>&lt;0.001</b> |
| <i>No</i>                              | 150 (40.0)       | 28 (25.7)                              | 122 (45.9)                          |                  |
| <i>Yes</i>                             | 225 (60.0)       | 81 (74.3)                              | 144 (54.1)                          |                  |
| Hospitalization, Yes (%)               | 0 (0.0)          | 0 (0.0)                                | 0 (0.0)                             | .                |
| Age (%)                                |                  |                                        |                                     | 0.178            |
| <i>6-12 years</i>                      | 496 (87.2)       | 92 (82.9)                              | 404 (88.2)                          |                  |
| <i>≥12 years</i>                       | 73 (12.8)        | 19 (17.1)                              | 54 (11.8)                           |                  |
| Doses of COVID-19 vaccine administered | 1.99 (0.4)       | 2.01 (0.3)                             | 1.98 (0.5)                          | *0.505           |

Data are expressed as mean and standard deviation, absolute numbers and percentages; Pts: participants; COVID-19: COroNaVirus Disease of 2019.

Bold p value<0.05; p value obtained from Chi squared test; \*p value obtained from Unpaired t test.
